# Supplementary material
Source: PubMed Central journal article supplement (PMC4710471)
Supplement: NIHMS749438-supplement-supplement_1.pdf [file NIHMS749438-supplement-supplement_1.pdf]

### Supplementary material

A second seed PLS analysis centered on the peak activation voxel of hippocampal activity associated with the *Self* condition, as revealed by the non-rotated analysis (LV3; MNI  $x,y,z = 32 -44 4$ ), was conducted. This analysis also identified a significant LV (LV5;  $p < .01$ , 41.29% crossblock, see Figure5) differentiating two patterns of task-related functional connectivity. Consistent with the results from LV4, one pattern was identified during the FamSim condition, while the second pattern was identified during the Self condition. However, this second pattern did not co-vary with the UnfDis condition (For the list of regions associated with LV 5, see tables 6a,b).

**Table 6a:** Peak regions functionally connected with a right hippocampal seed ( $y = -44$ ) during counterfactual simulations involving self versus a familiar similar character (LV 5). Note: All activations reported survived a threshold of  $p < .0002$  (BSR = 3.2), with a cluster size  $> 10$ . BA = approximate Brodmann area. L = Left; R = Right. \* The bootstrap ratio (BSR) is the parameter estimate for that voxel over its standard error. It is proportional to a z score.).

| REGION OF ACTIVATION   | HEMISPHERE | BA | VOXELS | MNI COORDINATES |     |     | BSR*    |
|------------------------|------------|----|--------|-----------------|-----|-----|---------|
|                        |            |    |        | X               | Y   | Z   |         |
| Cerebellum             | L - R      |    | 29     | -32             | -36 | -30 | -5.8174 |
| Superior Frontal Gyrus | R          | 10 | 51     | 24              | 62  | 4   | -5.3846 |
| Anterior Cingulate     | L          | 24 | 37     | -2              | 34  | 6   | -5.2040 |
| Thalamus               | L          |    | 24     | -4              | -8  | -2  | -5.1935 |
| Caudate                | L          |    | 17     | -12             | -32 | 24  | -4.0823 |

**Table 6b:** Peak regions functionally connected with a right hippocampal seed ( $y = -44$ ) during counterfactual simulation involving a familiar similar character versus self (LV 4).

| REGION OF ACTIVATION     | HEMISPHERE | BA | VOXELS | MNI COORDINATES |     |     | BSR*   |
|--------------------------|------------|----|--------|-----------------|-----|-----|--------|
|                          |            |    |        | X               | Y   | Z   |        |
| Middle Temporal Gyrus    | R - L      | 21 | 81     | 64              | 4   | -8  | 7.3621 |
| Inferior Parietal Lobule | L          | 40 | 159    | -46             | -52 | 56  | 6.5933 |
| Middle Frontal Gyrus     | L          | 8  | 253    | -48             | 16  | 48  | 5.8455 |
| Posterior Cingulate      | R          | 30 | 98     | 28              | -66 | 8   | 5.7316 |
| Precuneus                | L          | 19 | 67     | -32             | -86 | 38  | 5.6745 |
| Superior Temporal Gyrus  | R          | 38 | 27     | 54              | 10  | -10 | 5.6331 |
| Cerebellum               | R - L      |    | 115    | 46              | -74 | -40 | 5.6119 |
| Superior Frontal Gyrus   | L          | 6  | 45     | -12             | 20  | 56  | 5.4641 |
| Superior Temporal Gyrus  | L - R      | 22 | 24     | -32             | -50 | 18  | 4.6208 |
| Hippocampus              | R          |    | 51     | 28              | -12 | -18 | 4.5037 |
| Middle Frontal Gyrus     | L          | 10 | 86     | -46             | 50  | -2  | 4.4846 |
| Insula                   | L          | 13 | 13     | -42             | -12 | 4   | 4.3183 |
| Angular Gyrus            | R          | 39 | 82     | 36              | -60 | 32  | 4.2876 |
